# Supplementary material for: Spin-polarized transport properties in some transition metal dithiolene complexes
Source: Royal Society of Chemistry journal article supplement (doi:10.1039/c7cp05962k), 2017-01-01
Supplement: c7cp05962k1.pdf [file c7cp05962k1.pdf]

## Supplementary Information

### Spin-polarized transport properties in some transition metal dithiolene complexes

Vu Thi Thu Huong,<sup>a</sup> Truong Ba Tai,<sup>a</sup> Jyh-Chiang Jiang<sup>b</sup> and Minh Tho Nguyen<sup>a,c,\*</sup>

<sup>a</sup> *Department of Chemistry, KU Leuven, Celestijnenlaan 200F, B-3001 Leuven, Belgium*

<sup>b</sup> *Department of Chemical Engineering, National Taiwan University of Science and Technology, Taipei, Taiwan (R.O.C)*

<sup>c</sup> *Institute for Computational Science and Technology (ICST), Ho Chi Minh City, Vietnam*

Email: minh.nguyen@chem.kuleuven.be

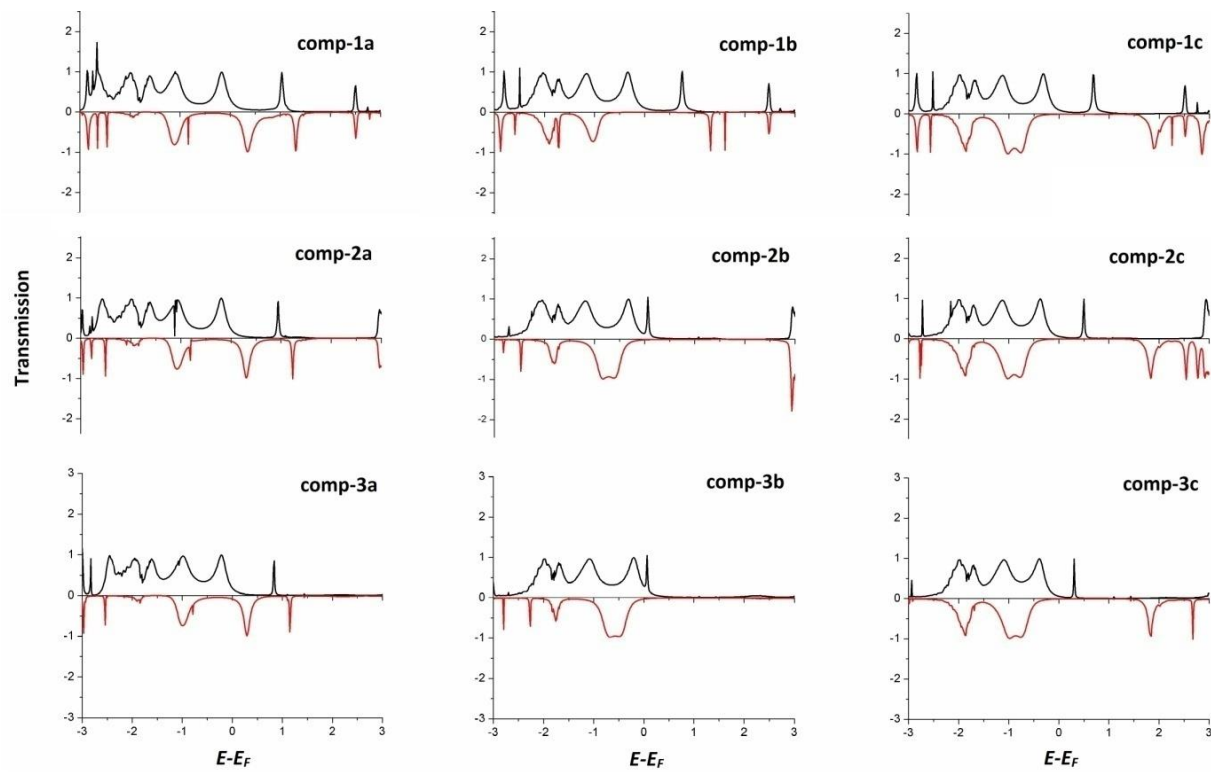

**Figure S1** The spin-resolved transmission spectra at zero bias of complexes **1a-1c**, **2a-2c** and **3a-3c**.

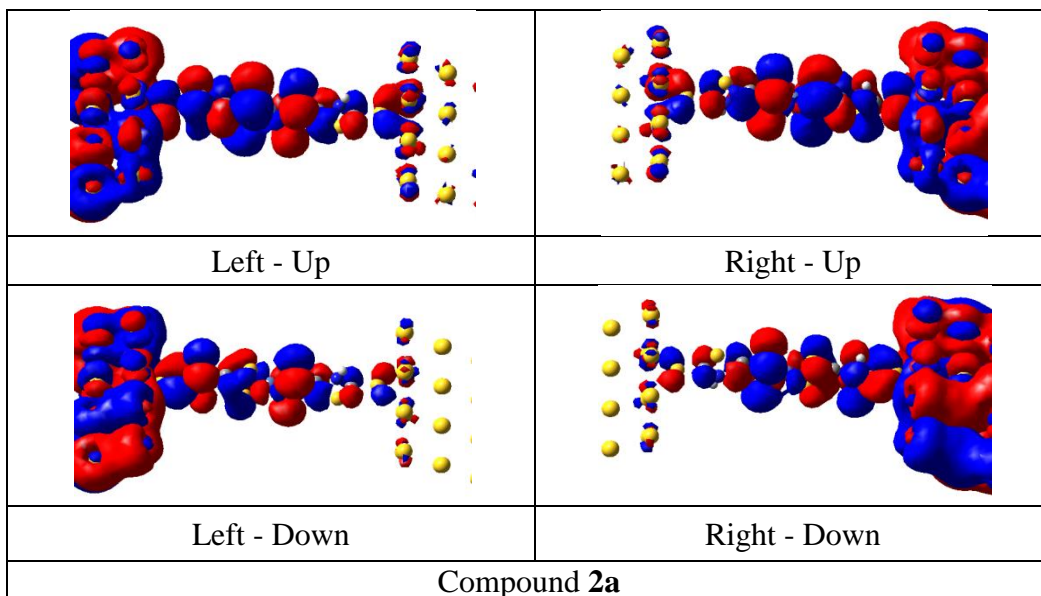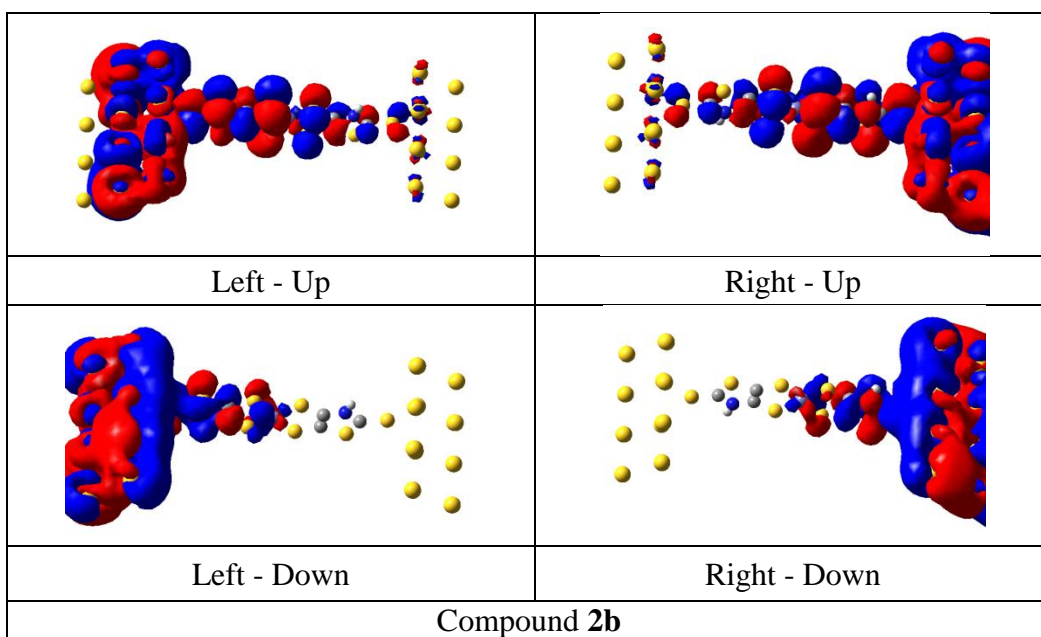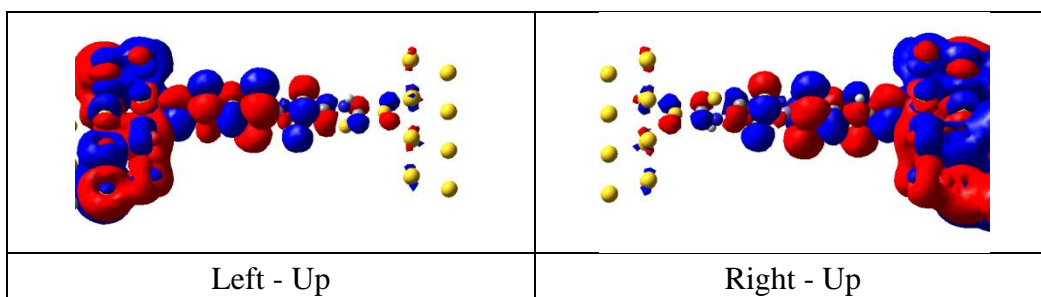

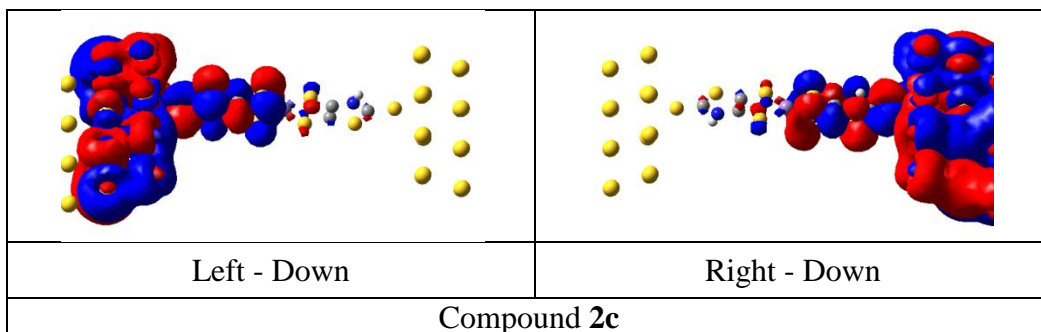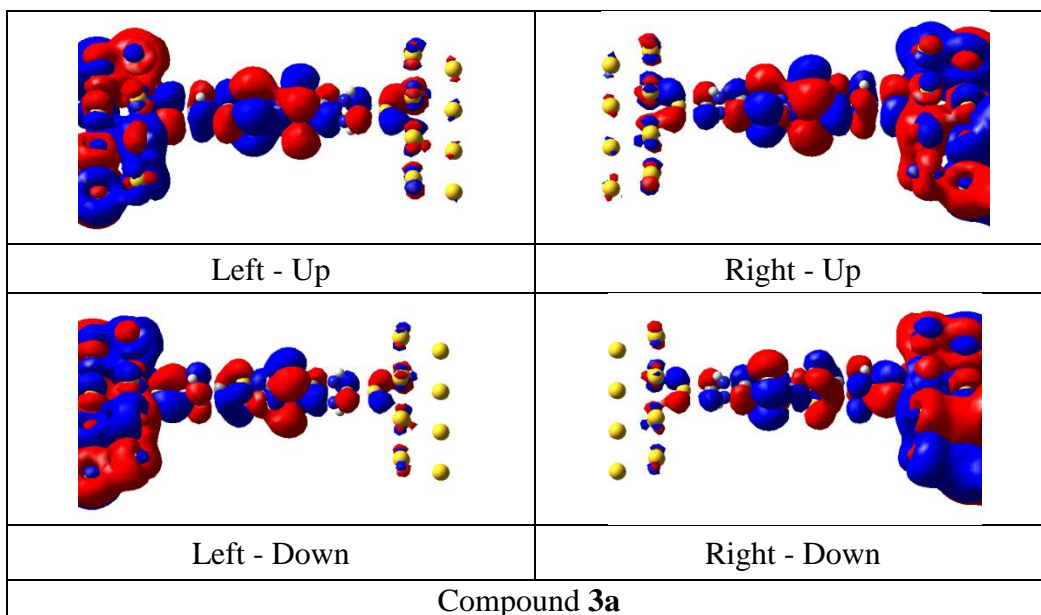

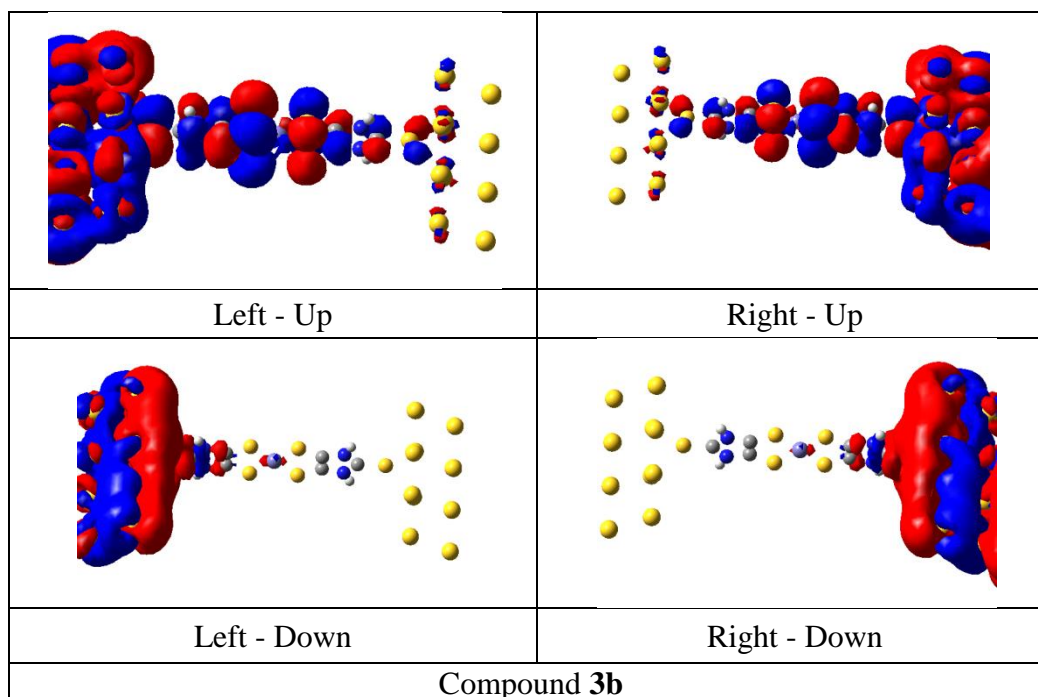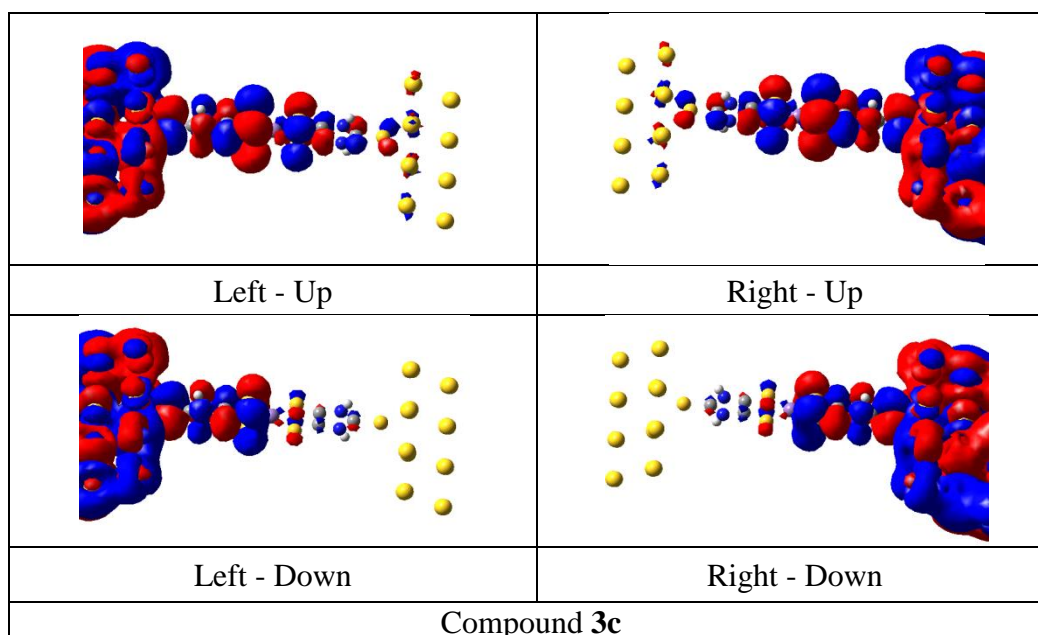

**Figure S2:** The first eigenchannels at Fermi level for complexes **2a-2c** and **3a-3c**

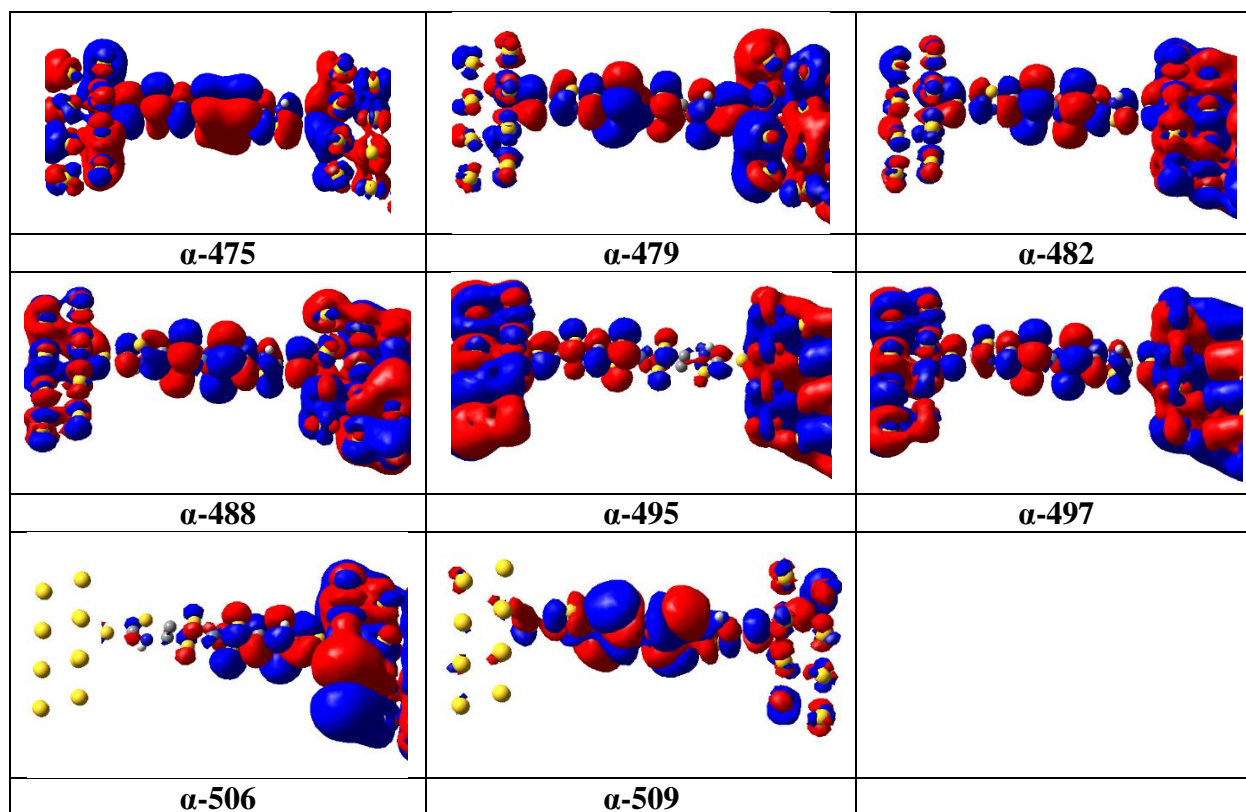

$\alpha$ -spin MPSH orbitals of 2a

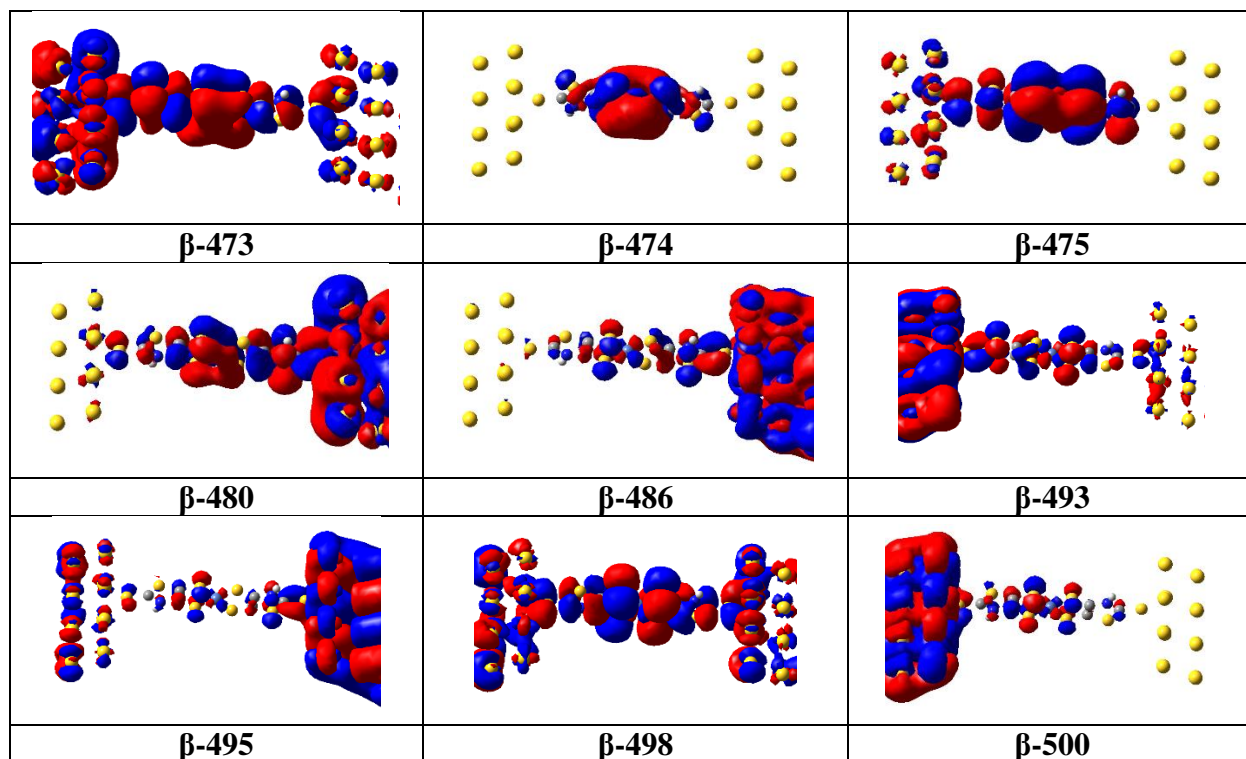

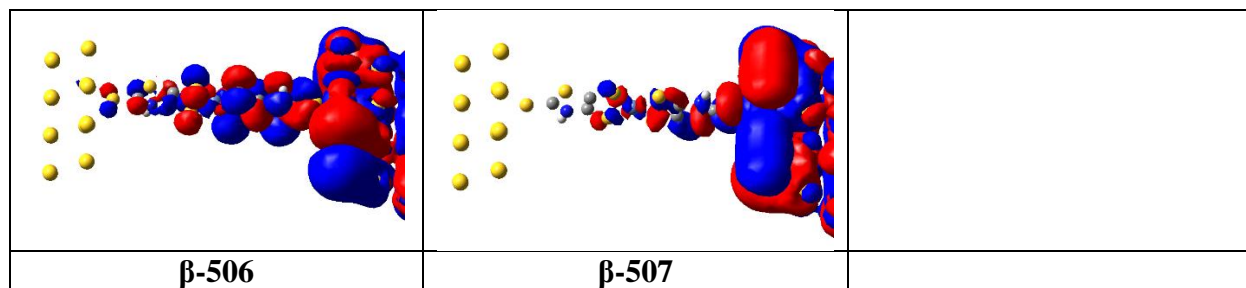

$\beta$ -spin MPSH orbitals of **2a**

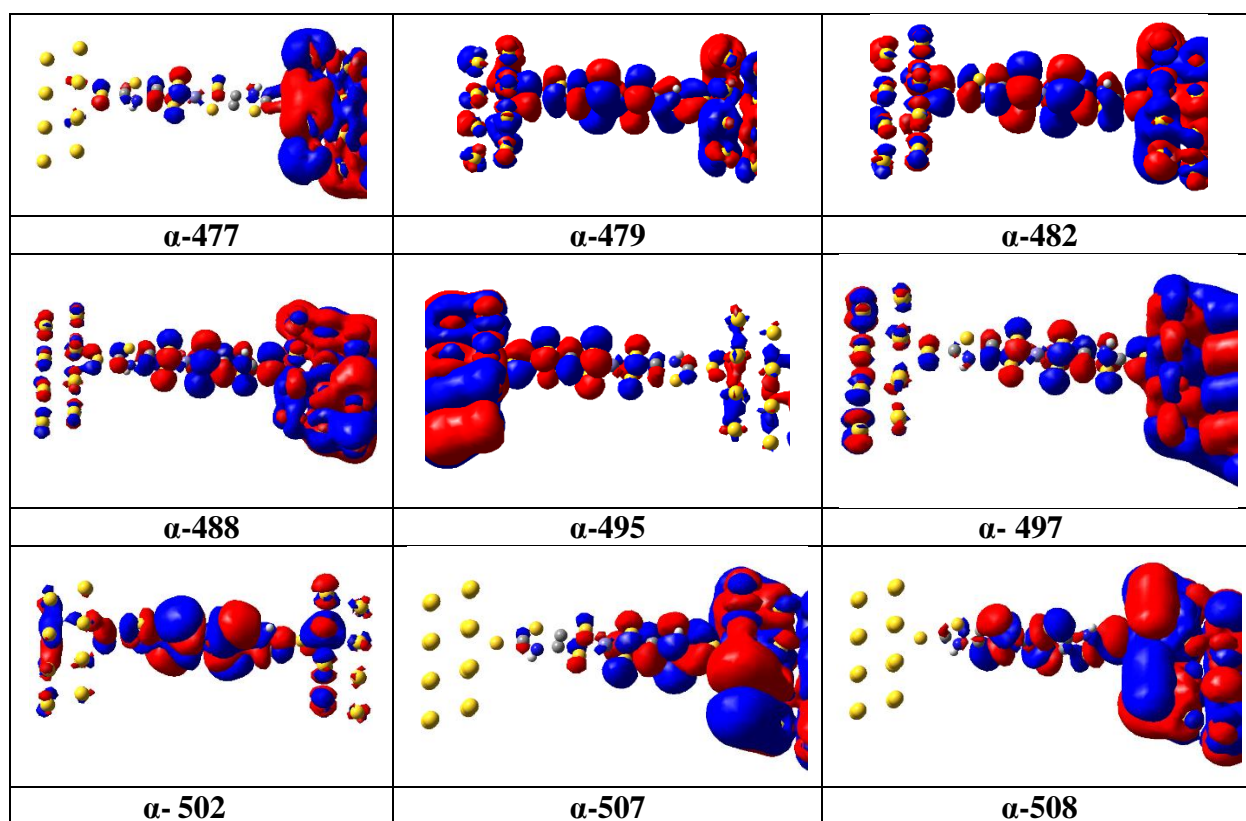

$\alpha$ -spin MPSH orbitals of **2b**

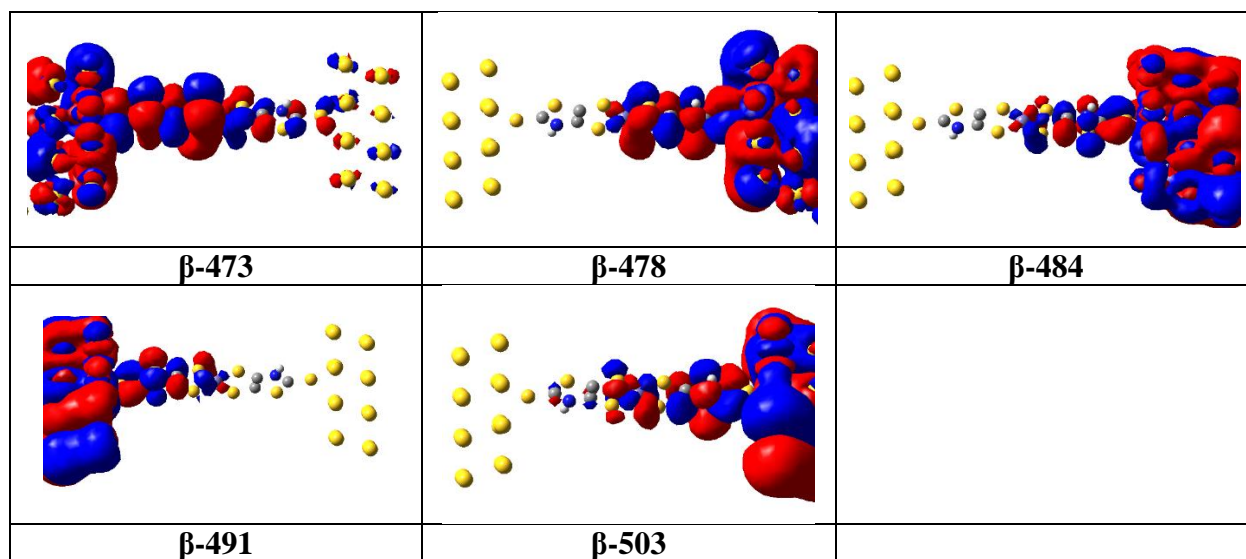

$\beta$ -spin MPSH orbitals of **2b**

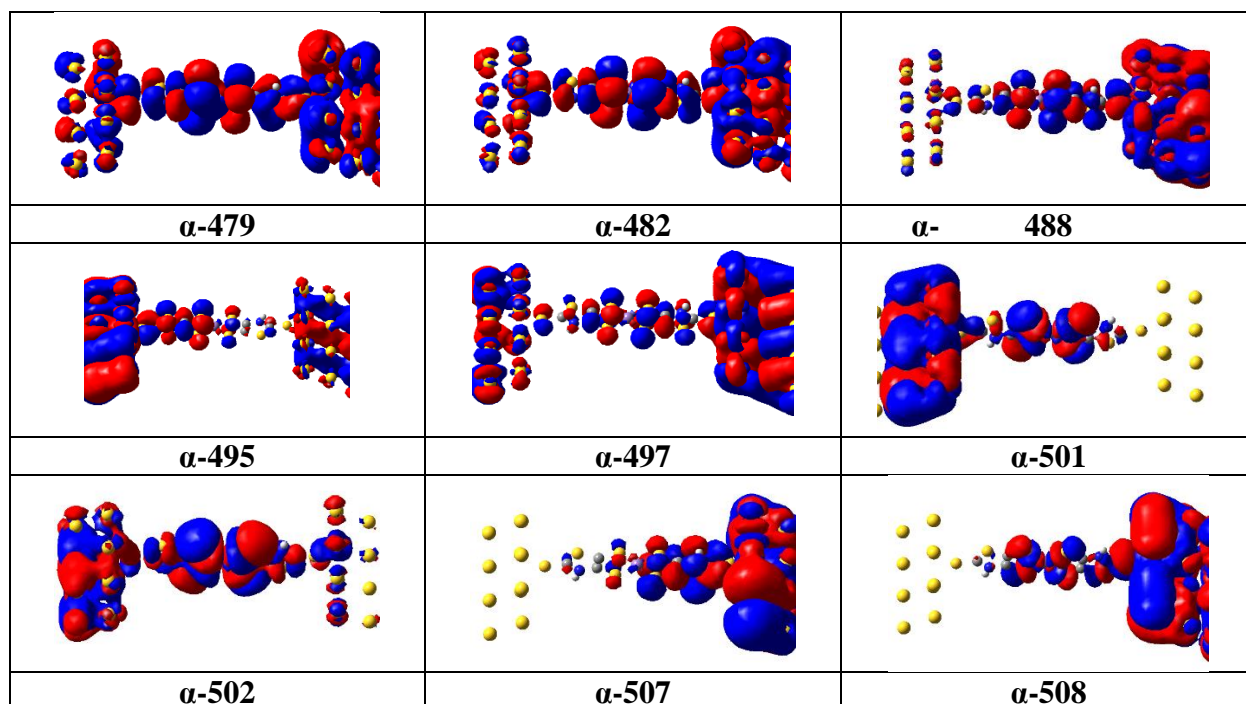

$\alpha$ -spin MPSH orbitals of **2c**



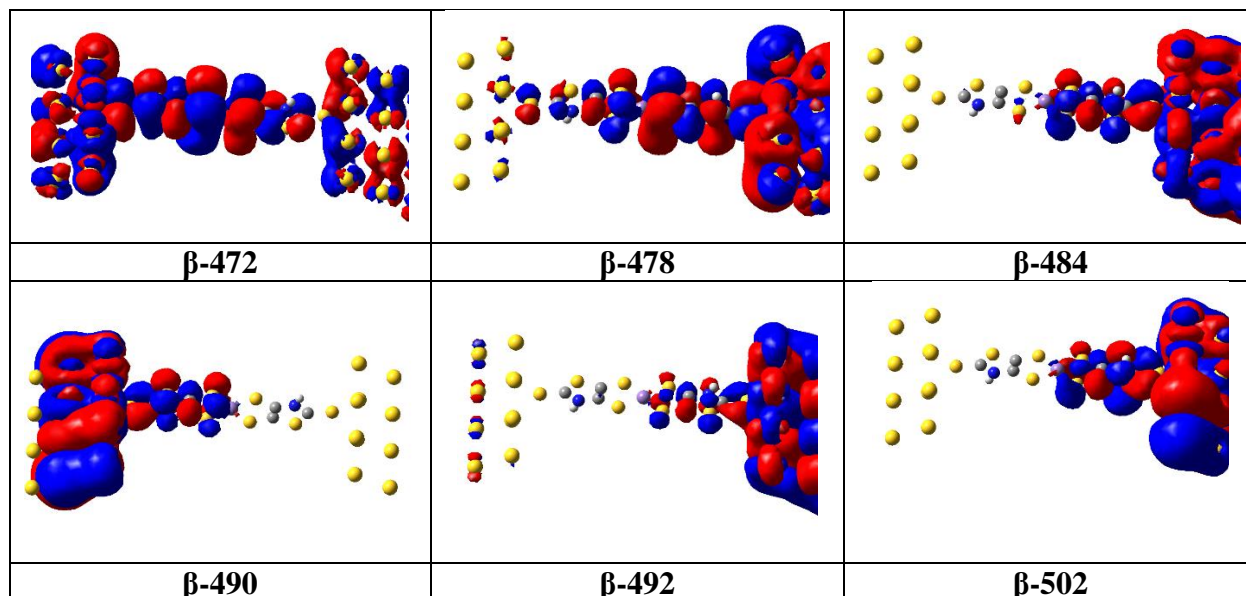

$\beta$ -spin MPSH orbitals of **2c**

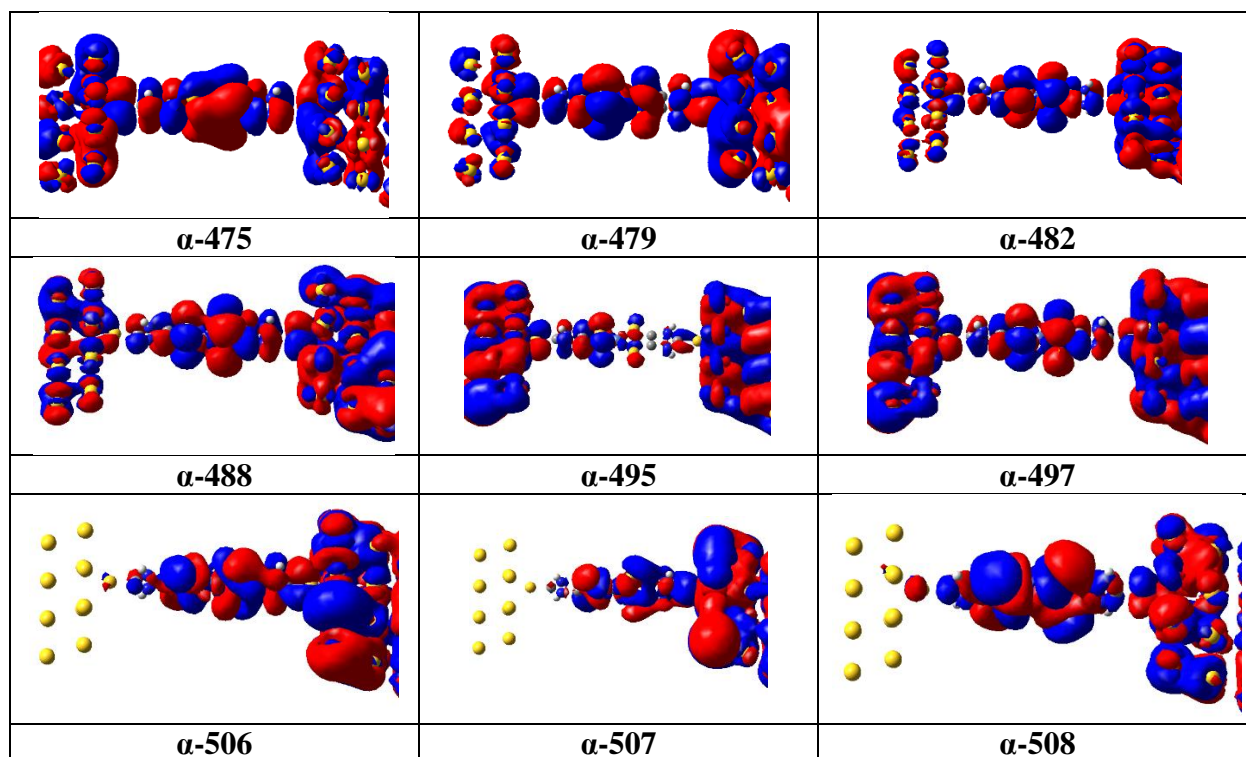

$\alpha$ -spin MPSH orbitals of **3a**

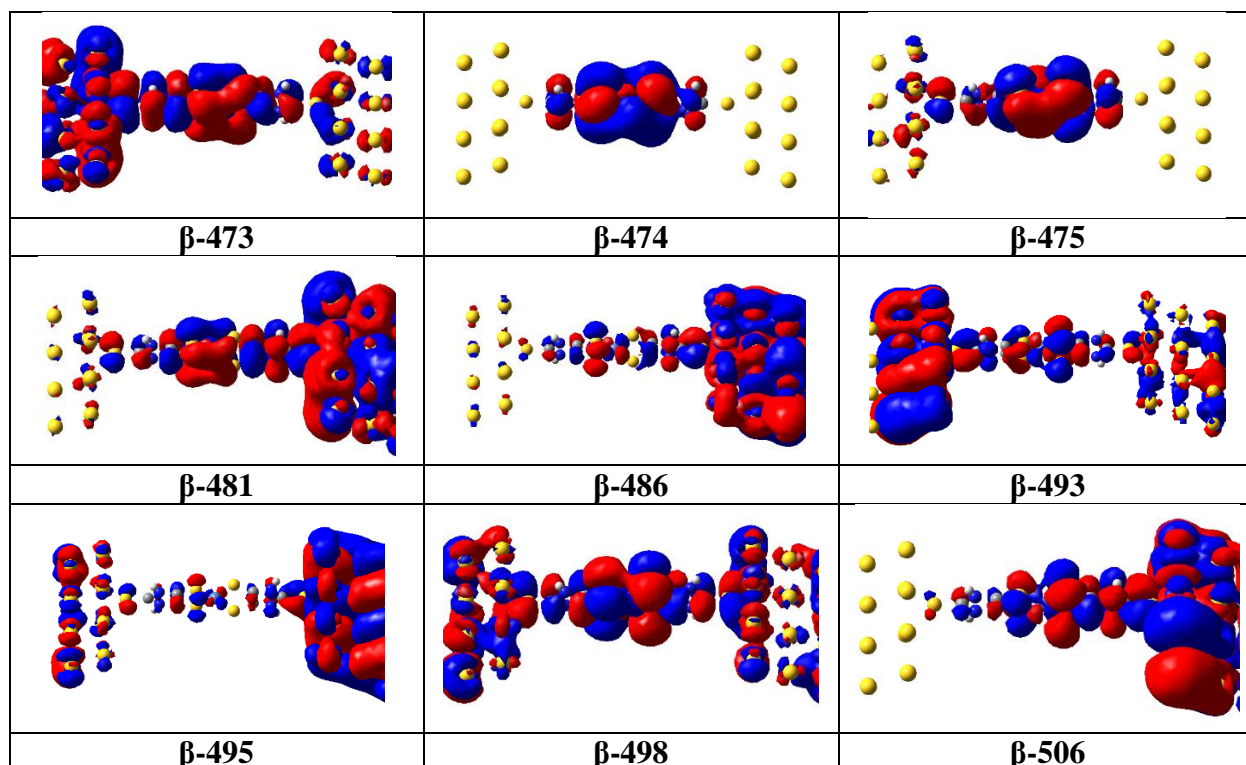

$\beta$ -spin MPSH orbitals of **3a**

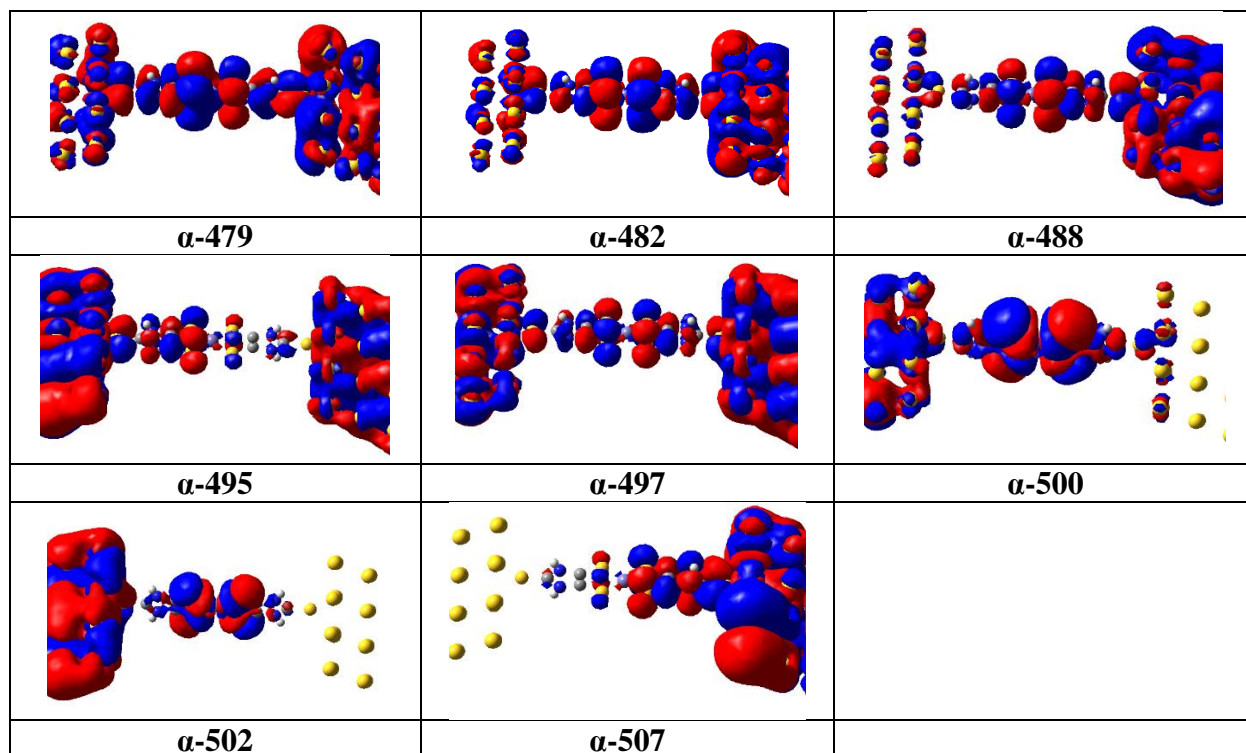

$\alpha$ -spin MPSH orbitals of **3b**

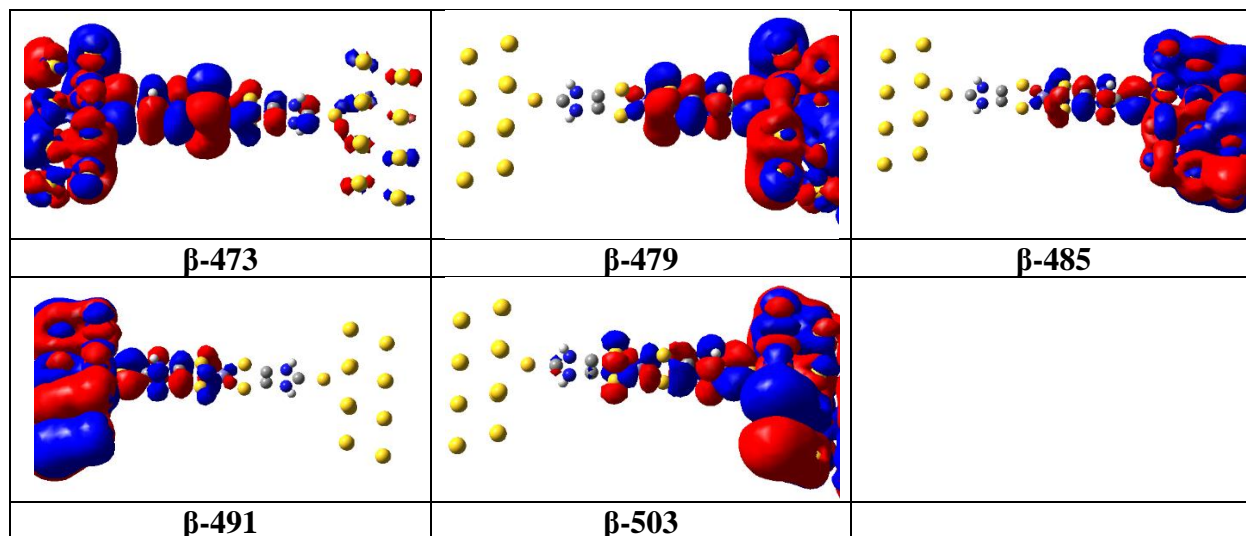

$\beta$ -spin MPSH orbitals of **3b**

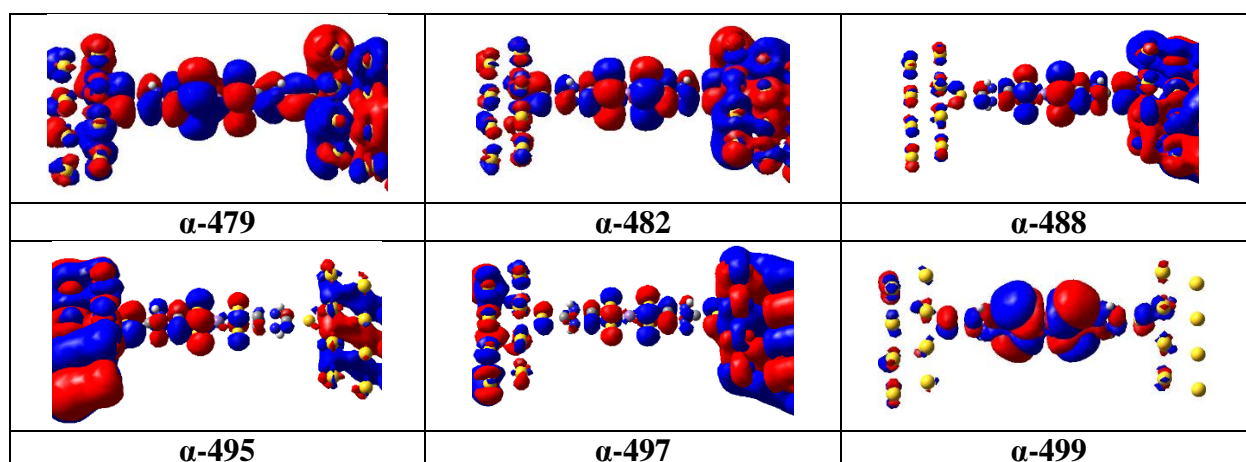

$\alpha$ -spin MPSH orbitals of **3c**

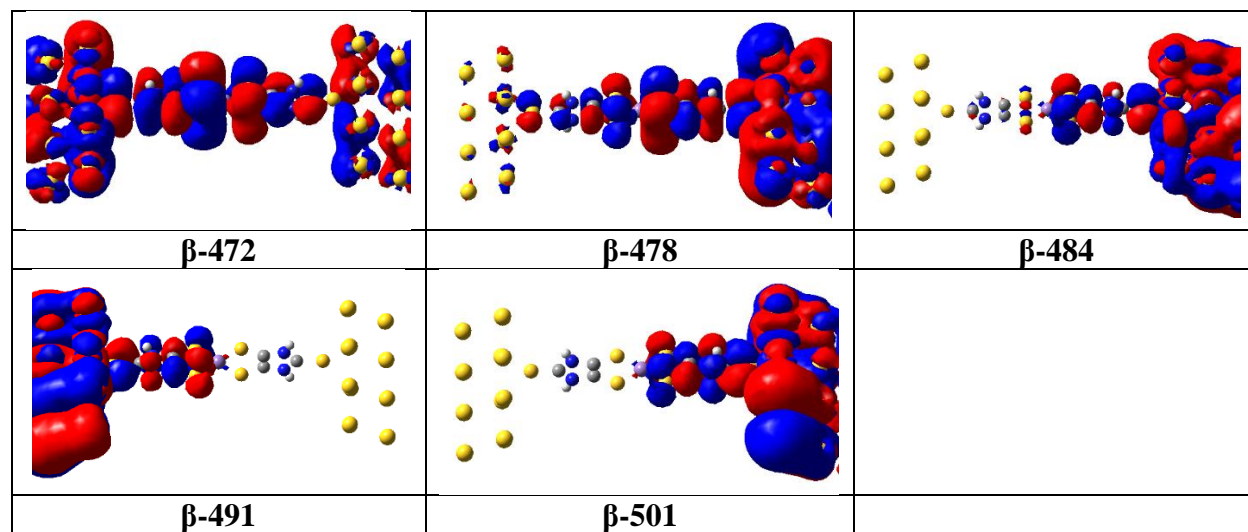

$\beta$ -spin MPSH orbitals of **3c**

**Figure S3** The partial distribution of MPSH orbitals of complexes **2a-2c** and **3a-3c**

**1a**

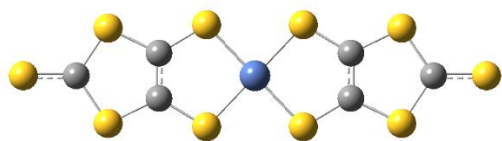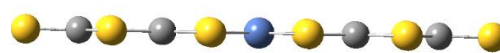

**1b**

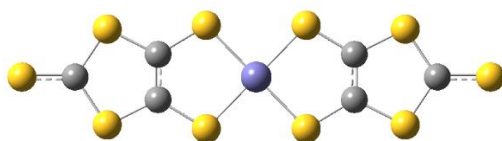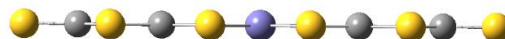

**1c**

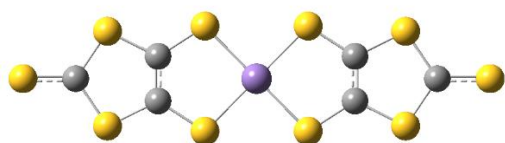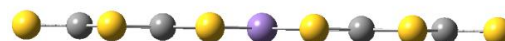

**2a**

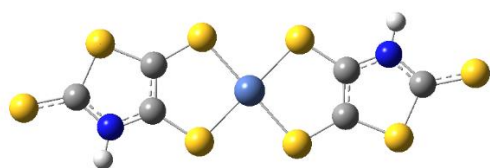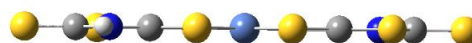

**2b**

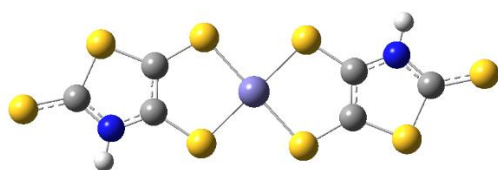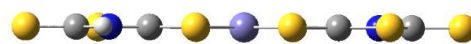

**2c**

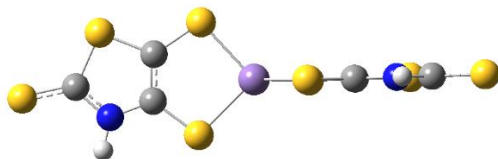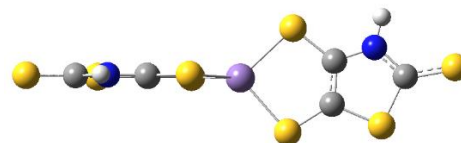

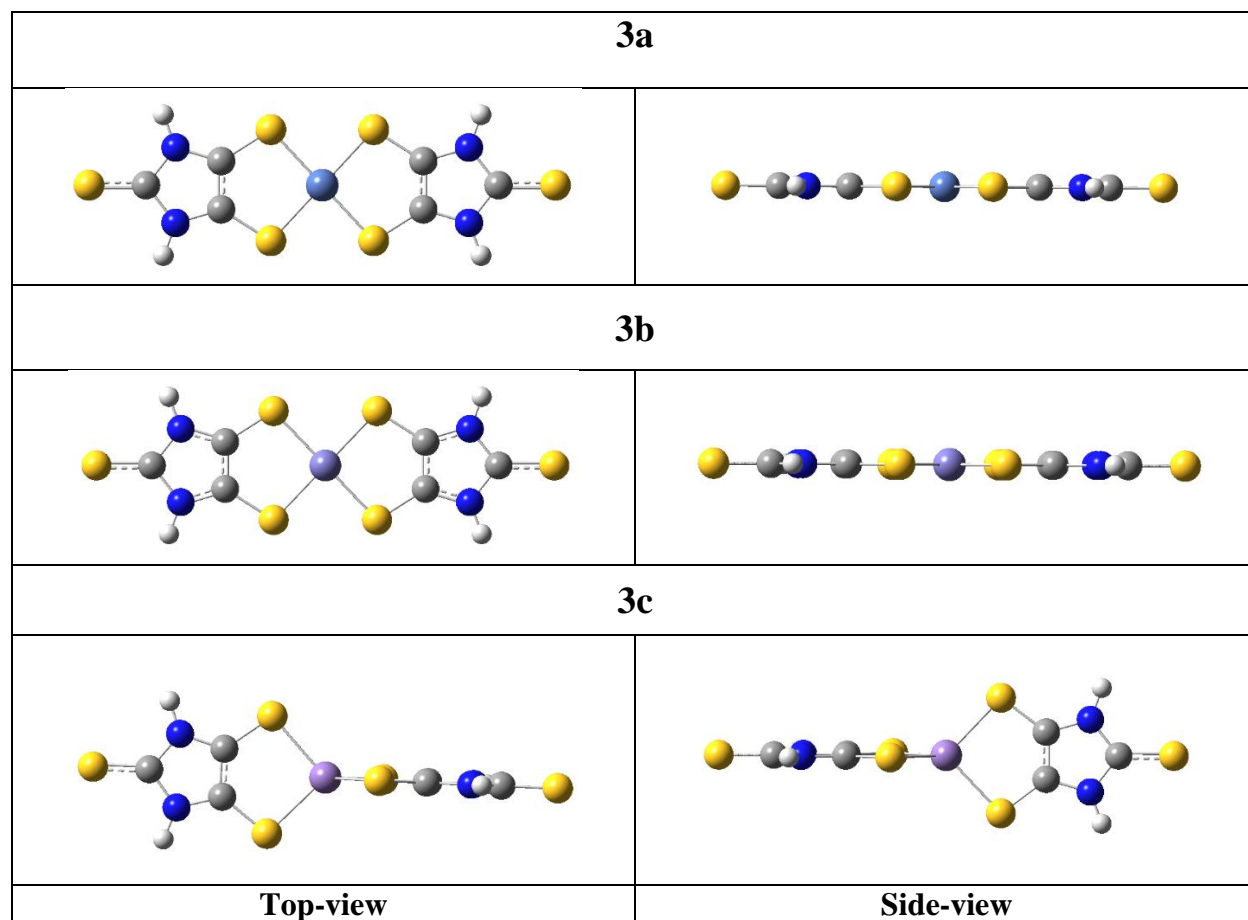

**Figure S4** The shapes of all complexes **1a-3a**, **1b-3b** and **1c-3c** obtained at PBE/6-31G(d,p) level of theory
